# Supplementary material for: Opportunities for nanotechnology to enhance electrochemical treatment of pollutants in potable water and industrial wastewater – a perspective
Source: Royal Society of Chemistry journal article supplement (doi:10.1039/d0en00194e), 2020-01-01
Supplement: d0en00194e1.pdf [file d0en00194e1.pdf]

## Supporting Information

### ***Opportunities for Nanotechnology to Enhance Electrochemical Treatment of Pollutants in Potable Water and Industrial Wastewater -A perspective***

*Sergi Garcia-Segura<sup>a,\*</sup>, Xiaolei Qu<sup>b</sup>, Pedro J.J. Alvarez<sup>c</sup>, Brian P. Chaplin<sup>d</sup>, Wei Chen<sup>e</sup>, John C Crittenden<sup>f</sup>, Yujie Feng<sup>g</sup>, Guandao Gao<sup>b</sup>, Zhen He<sup>h</sup>, Chia-Hung Hou<sup>i</sup>, Xiao Hu<sup>j</sup>, Guibin Jiang<sup>k</sup>, Jae-Hong Kim<sup>l</sup>, Jiansheng Li<sup>m</sup>, Qilin Li<sup>c</sup>, Jie Ma<sup>n</sup>, Jinxing Ma<sup>o</sup>, Alec Brockway Nienhauser<sup>a</sup>, Junfeng Niu<sup>p</sup>, Bingcai Pan<sup>b</sup>, Xie Quan<sup>q</sup>, Filippo Ronzani<sup>r</sup>, Dino Villagran<sup>s</sup>, T. David Waite<sup>o</sup>, W. Shane Walker<sup>s</sup>, Can Wang<sup>t</sup>, Michael S. Wong<sup>c</sup>, Paul Westerhoff<sup>a,\*\*</sup>*

<sup>a</sup>Nanosystems Engineering Research Center for Nanotechnology-Enabled Water Treatment, School of Sustainable Engineering and the Built Environment, Arizona State University, Tempe, Arizona 85287-5306, United States of America

<sup>b</sup>State Key Laboratory of Pollution Control and Resource Reuse, School of the Environment, Nanjing University, Jiangsu 210023, China

<sup>c</sup>Nanosystems Engineering Research Center for Nanotechnology-Enabled Water Treatment, Rice University, Houston, TX 77005, United States of America

<sup>d</sup>University of Illinois at Chicago, 945 West Taylor St, Chicago, IL 60608, United States of America

<sup>e</sup>Nankai University, 38 Tongyan Rd., Tianjin, 300350, China

<sup>f</sup>Georgia Institute of Technology, School of Civil and Environmental Engineering, 828 West Peachtree St., Suite 303, Atlanta, Georgia 30332-0595, United States of America

<sup>g</sup>State Key Lab of Urban Water Resources and Environment, School of Environment, Harbin Institute of Technology, No. 73 Huanghe Road, Harbin 150090, China

<sup>h</sup>Washington University in St. Louis, St. Louis, MO 63130, United States of America

<sup>i</sup>National Taiwan University, No. 1 Sec. 4, Roosevelt Rd., Taipei 10617, Taiwan

<sup>j</sup>Nanyang Technological University, Singapore

<sup>k</sup>State Key Laboratory of Environmental Chemistry and Ecotoxicology, Research Center for Eco-Environmental Sciences, Chinese Academy of Sciences, P. O. Box 2871, 18 Shuangqing Road, Haidian District, Beijing, 100085 China

<sup>l</sup>Nanosystems Engineering Research Center for Nanotechnology-Enabled Water Treatment, Department of Chemical and Environmental Engineering and, Yale University, 17 Hillhouse Avenue, New Haven, Connecticut, United States of America

<sup>m</sup>Nanjing University of Science and Technology, Xiaolingwei 200, Nanjing 210094, China

<sup>n</sup>State Key Laboratory of Heavy Oil Processing, Beijing Key Lab of Oil & Gas Pollution Control, China University of Petroleum-Beijing, Beijing 102249, China

<sup>o</sup>University of New South Wales, Sydney, NSW 2052, Australia

<sup>p</sup>Research Center for Eco-environmental Engineering, Dongguan University of Technology, Dongguan 523808, China

<sup>q</sup>School of Environmental and Biological Science and Technology, Dalian University of Technology, Dalian 116024, China

<sup>r</sup>Industrie De Nora s.p.a., De Nora Tech llc, 7590 Discovery Lane, Concord, Ohio 44077, United States of America

<sup>s</sup>Nanosystems Engineering Research Center for Nanotechnology-Enabled Water Treatment, University of Texas at El Paso, 500 W. University Ave, El Paso, TX 79968

Corresponding author:

\*E-mail address: [p.westerhoff@asu.edu](mailto:p.westerhoff@asu.edu) (P. Westerhoff).

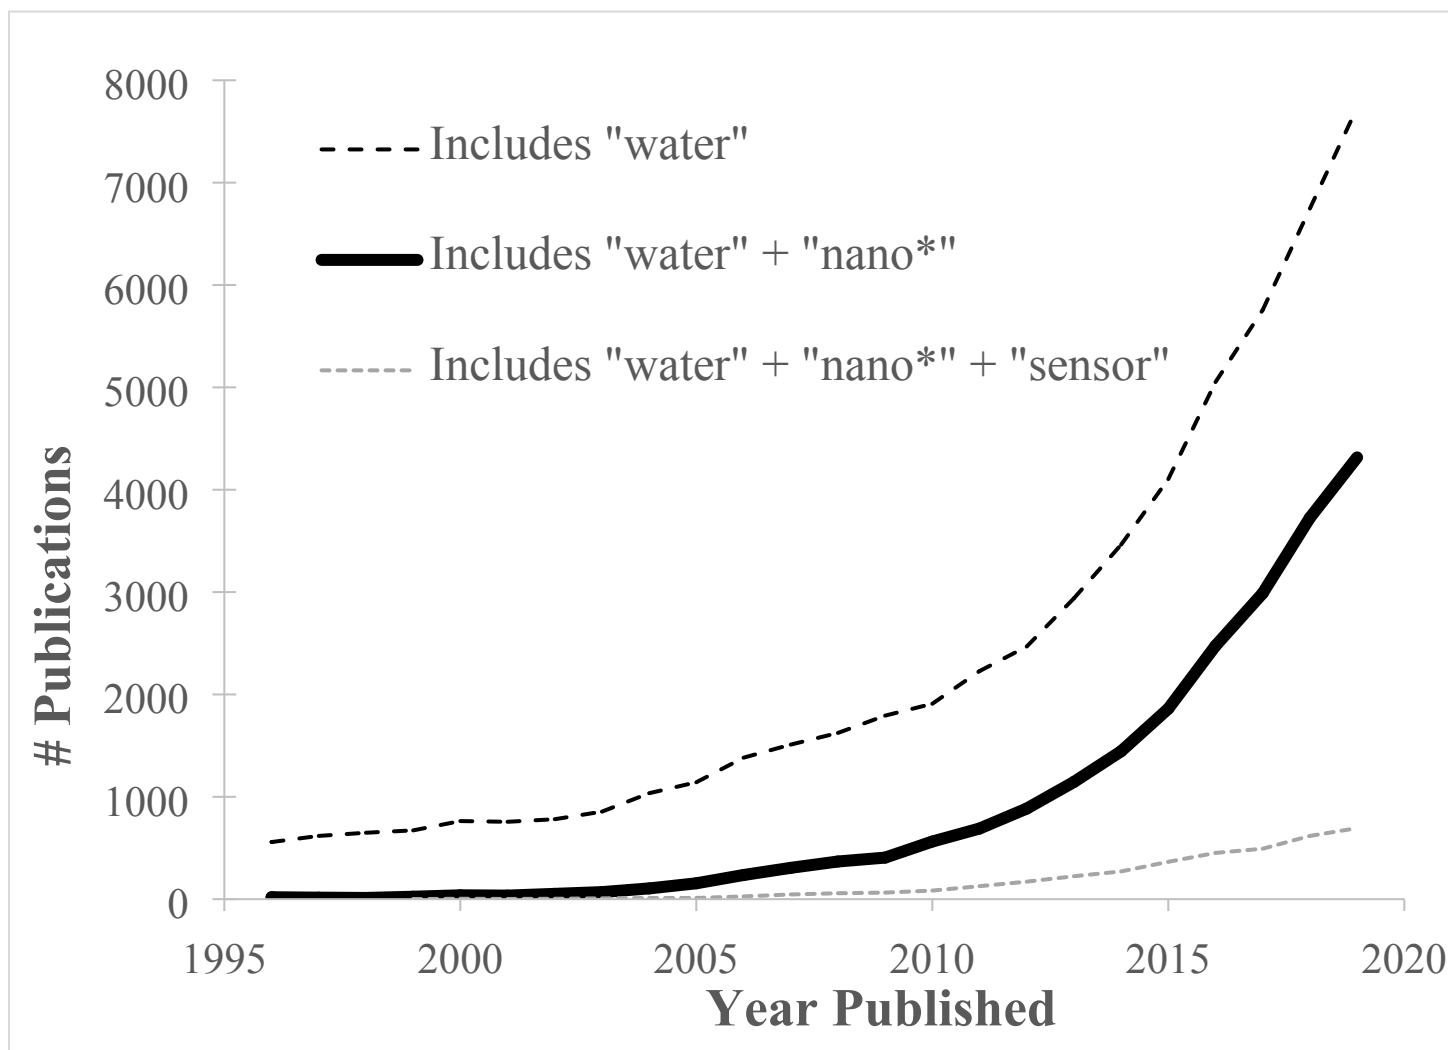

**Figure SI 1.** Number of publications on electrochemical water treatment and the increasing relevance of nanotechnology in the field.

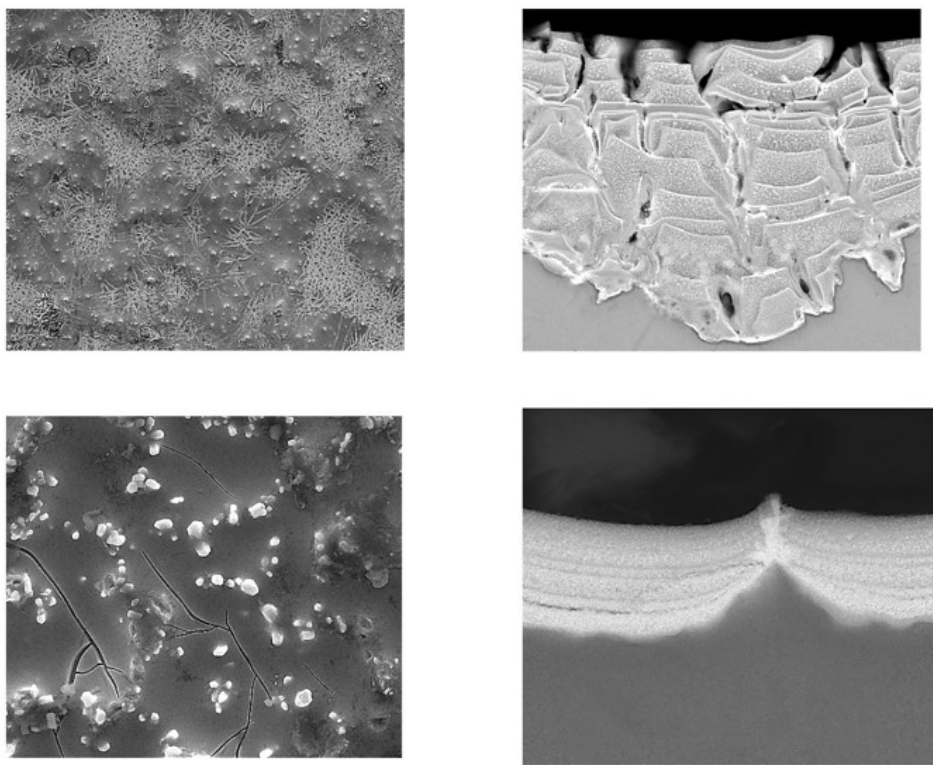

**Figure SI 2.** Micrographs of commercial DSA<sup>®</sup> electrodes.

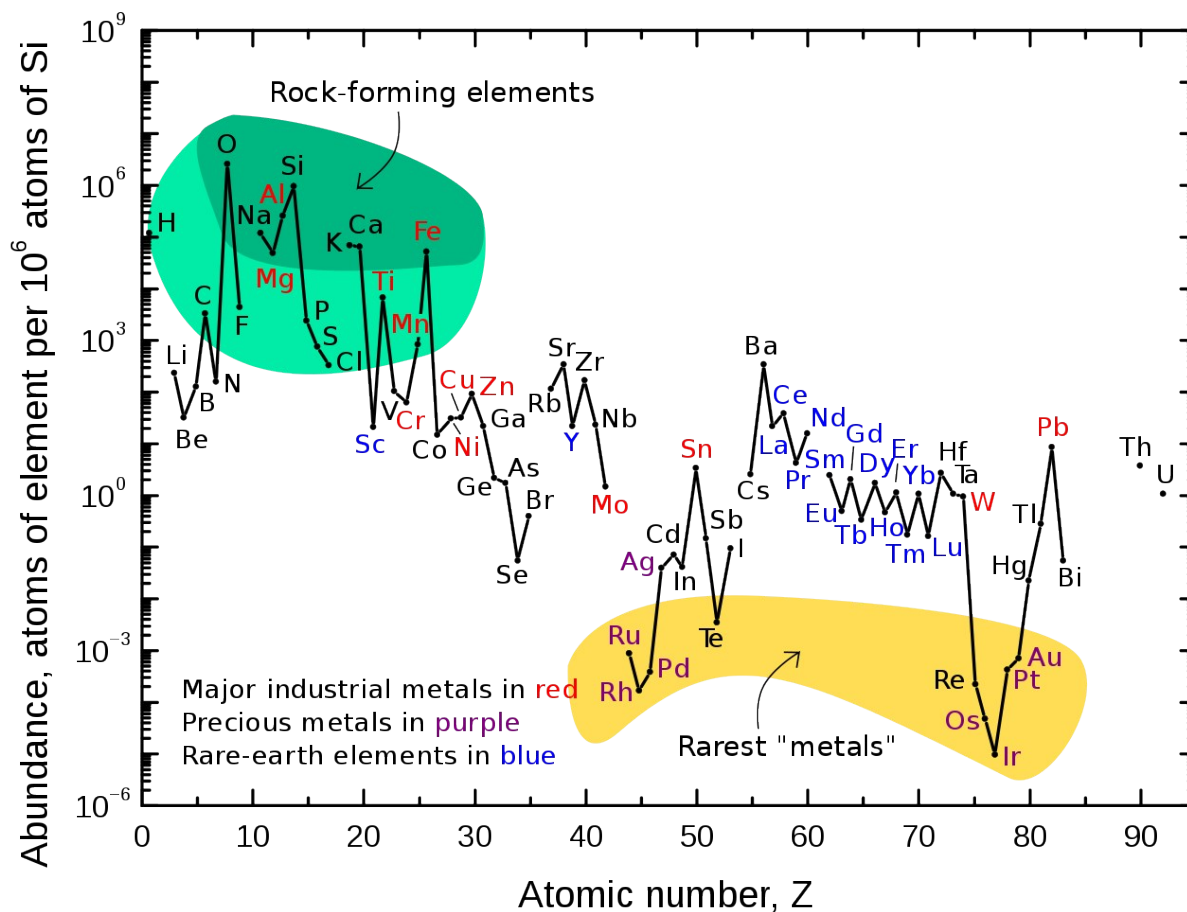

**Figure SI 3.** Critical resources for electrocatalysis. Abundance (atom fraction) of the chemical elements in Earth's upper continental crust as a function of atomic number. (source: <https://pubs.usgs.gov/fs/2002/fs087-02/>)
